# Supplementary material for: Blood Flow Restriction Is Not Useful as Soccer Competition Recovery in Youth Male National-Level Soccer Players: A Crossover Randomised Controlled Trial
Source: MDPI journal article supplement (doi:10.3390/sports11050099), 2023-05-07
Supplement: s1 [file s1]

**Table S1.** Results from wellness questionnaire items, according to BFR or NoBFR condition as recovery session.

| Wellness items<br>(1 to 5 score)                    | BFR<br>Mean (SD) | NoBFR<br>Mean (SD) |
|-----------------------------------------------------|------------------|--------------------|
| <b>Fatigue</b>                                      |                  |                    |
| Match day                                           | 4.15 (0.86)      | 4.15 (0.87)        |
| Post24h                                             | 2.87 (0.85)      | 3.07 (0.92)        |
| Post48h                                             | 3.67 (0.76)      | 3.89 (0.85)        |
| Post72h                                             | 4.20 (0.79)      | 4.20 (0.76)        |
| <b>Sleep</b>                                        |                  |                    |
| Match day                                           | 4.60 (0.54)      | 4.56 (0.64)        |
| Post24h                                             | 4.12 (0.82)      | 4.05 (1.07)        |
| Post48h                                             | 4.35 (0.76)      | 4.33 (0.80)        |
| Post72h                                             | 4.45 (0.67)      | 4.28 (0.82)        |
| <b>Muscle soreness</b>                              |                  |                    |
| Match day                                           | 3.95 (0.93)      | 3.87 (0.89)        |
| Post24h                                             | 2.87 (0.93)      | 3.07 (1.01)        |
| Post48h                                             | 3.50 (0.78)      | 3.74 (0.90)        |
| Post72h                                             | 3.97 (0.80)      | 4.12 (0.86)        |
| <b>Stress</b>                                       |                  |                    |
| Match day                                           | 4.20 (0.99)      | 4.15 (0.90)        |
| Post24h                                             | 4.05 (0.98)      | 4.12 (0.89)        |
| Post48h                                             | 4.25 (0.98)      | 4.15 (0.90)        |
| Post72h                                             | 4.05 (1.06)      | 4.28 (0.82)        |
| <b>Mood</b>                                         |                  |                    |
| Match day                                           | 4.40 (0.70)      | 4.30 (0.73)        |
| Post24h                                             | 4.22 (0.79)      | 4.23 (0.80)        |
| Post48h                                             | 4.27 (0.78)      | 4.20 (0.65)        |
| Post72h                                             | 4.32 (0.65)      | 4.20 (0.95)        |
| BFR, blood flow restriction; SD, standard deviation |                  |                    |
